# Supplementary material for: A Peripheral Blood Signature of Increased Th1 and Myeloid Cells Combined with Serum Inflammatory Mediators Is Associated with Response to Abatacept in Rheumatoid Arthritis Patients
Source: MDPI journal article supplement (doi:10.3390/cells12242808), 2023-12-09
Supplement: s1 [file s1]

Figure S1

Sensitivity analysis of the composite index as a predictor of clinical responses

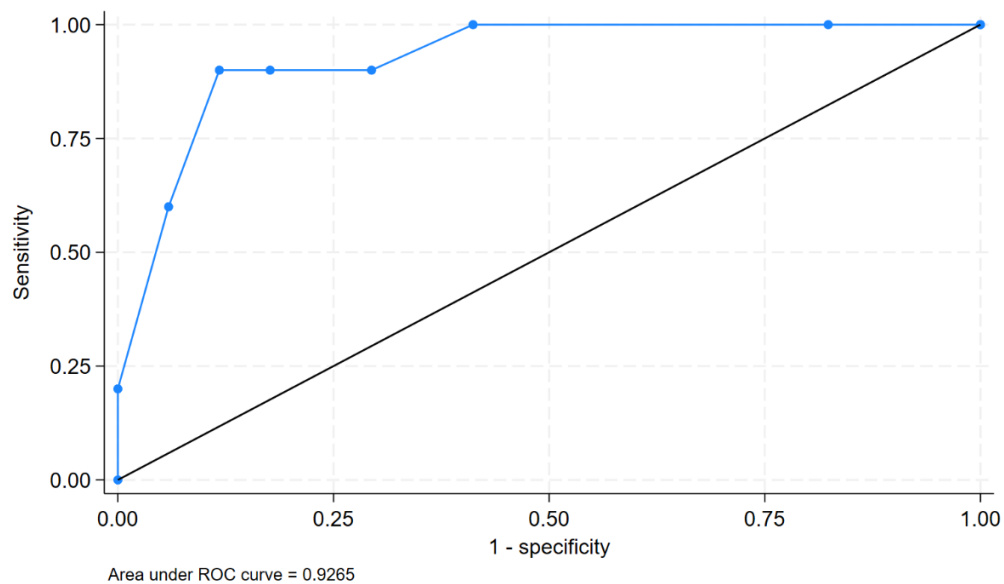

Detailed report of sensitivity and specificity

| Cutpoint     | Sensitivity | Specificity | Correctly classified | LR+     | LR-    |
|--------------|-------------|-------------|----------------------|---------|--------|
| ( $\geq 0$ ) | 100.00%     | 0.00%       | 37.04%               | 1.0000  |        |
| ( $\geq 1$ ) | 100.00%     | 17.65%      | 48.15%               | 1.2143  | 0.0000 |
| ( $\geq 2$ ) | 100.00%     | 58.82%      | 74.07%               | 2.4286  | 0.0000 |
| ( $\geq 3$ ) | 90.00%      | 70.59%      | 77.78%               | 3.0600  | 0.1417 |
| ( $\geq 4$ ) | 90.00%      | 82.35%      | 85.19%               | 5.1000  | 0.1214 |
| ( $\geq 5$ ) | 90.00%      | 88.24%      | 88.89%               | 7.6500  | 0.1133 |
| ( $\geq 6$ ) | 60.00%      | 94.12%      | 81.48%               | 10.2000 | 0.4250 |
| ( $\geq 8$ ) | 20.00%      | 100.00%     | 70.37%               |         | 0.8000 |
| ( $> 8$ )    | 0.00%       | 100.00%     | 62.96%               |         | 1.0000 |

| Obs | ROC area | Std. err. | Asymptotic normal<br>[95% conf. interval] |         |
|-----|----------|-----------|-------------------------------------------|---------|
| 27  | 0.9265   | 0.0492    | 0.82995                                   | 1.00000 |
